# Supplementary material
Source: publisher figshare collection journal article supplement (https://aacr.figshare.com/articles/dataset/_/22787590)
Supplement: Supplementary file 1 [file 40496221]

**Table S2. Information of healthy subjects and urothelial carcinoma patients enrolled in PET/CT imaging studies using <sup>68</sup>Ga-N188 and <sup>18</sup>F-FDG.**

|           | <b>Gender</b> | <b>Age(<br/>year<br/>old)</b> | <b>Weight<br/>(kg)</b> | <b><sup>68</sup>Ga-N188<br/>dose<br/>(Mbg)</b> | <b><sup>68</sup>Ga-N188<br/>PET/CT protocol</b> | <b><sup>18</sup>F-FDG<br/>PET/CT protocol</b> |
|-----------|---------------|-------------------------------|------------------------|------------------------------------------------|-------------------------------------------------|-----------------------------------------------|
| <b>1</b>  | Female        | 30                            | 56                     | 71.6                                           | Dynamic (0-60min);<br>Static (120min)           |                                               |
| <b>2</b>  | Female        | 61                            | 70                     | 88.4                                           | Dynamic (0-40min);<br>Static (120-125min)       | Static(40-45min)                              |
| <b>3</b>  | Male          | 69                            | 75                     | 93.8                                           | Dynamic (0-40min);<br>Static (120-125min)       | Static(40-45min)                              |
| <b>4</b>  | Female        | 68                            | 55                     | 68.2                                           | Static (40-45min)                               |                                               |
| <b>5</b>  | Female        | 67                            | 53                     | 66.9                                           | Static (40-45min);<br>Static (120-125min)       | Static(40-45min)                              |
| <b>6</b>  | Male          | 72                            | 64                     | 79.9                                           | Static (40-45min);<br>Static (120-125min)       | Static(40-45min)                              |
| <b>7</b>  | Male          | 69                            | 90                     | 109.5                                          | Static (40-45min);<br>Static (120-125min)       | Static(40-45min)                              |
| <b>8</b>  | Male          | 66                            | 65                     | 82.3                                           | Dynamic (0-40min);<br>Static (120-125min)       | Static(40-45min)                              |
| <b>9</b>  | Male          | 53                            | 83                     | 103.2                                          | Dynamic (0-40min);<br>Static (120-125min)       | Static(40-45min)                              |
| <b>10</b> | Male          | 69                            | 65                     | 79.6                                           | Dynamic (0-40min);<br>Static (120-125min)       | Static(40-45min)                              |
| <b>11</b> | Male          | 62                            | 72.5                   | 88.7                                           | Static (40-45min);<br>Static (120-125min)       | Static(40-45min)                              |
| <b>12</b> | Male          | 68                            | 82.5                   | 103.0                                          | Static (40-45min);<br>Static (120-125min)       | Static(40-45min)                              |
| <b>13</b> | Male          | 55                            | 92                     | 116.3                                          | Static (40-45min);<br>Static (120-125min)       | Static(40-45min)                              |
| <b>14</b> | Female        | 73                            | 53                     | 67.8                                           | Static (40-45min);<br>Static (120-125min)       | Static(40-45min)                              |
| <b>15</b> | Male          | 51                            | 53                     | 66.7                                           | Static (40-45min);<br>Static (120-125min)       | Static(40-45min)                              |
| <b>16</b> | Male          | 57                            | 71                     | 88.5                                           | Static (40-45min);<br>Static (120-125min)       | Static(40-45min)                              |
